# Supplementary material for: Mixed unsymmetric oxadiazoline and/or imine platinum(ii) complexes
Source: Royal Society of Chemistry journal article supplement (doi:10.1039/b704329e), 2007-01-01
Supplement: b704329e.pdf [file b704329e.pdf]

=====  
S U P P L E M E N T A R Y   M A T E R I A L  
=====  
  
B E L O N G I N G   T O   T H E   P A P E R

b y

C o n t e n t s  
=====

|          |                                                                                                                              |
|----------|------------------------------------------------------------------------------------------------------------------------------|
| Table S1 | - Crystal Data and Details of the Structure Determination<br>for: jl80f4b in P c c n                                         |
| Table S2 | - Final Coordinates and Equivalent Isotropic Displacement<br>Parameters of the non-Hydrogen atoms<br>for: jl80f4b in P c c n |
| Table S3 | - Hydrogen Atom Positions and Isotropic Displacement<br>Parameters<br>for: jl80f4b in P c c n                                |
| Table S4 | - (An)isotropic Displacement Parameters<br>for: jl80f4b in P c c n                                                           |
| Table S5 | - Bond Distances (Angstrom)<br>for: jl80f4b in P c c n                                                                       |
| Table S6 | - Bond Angles (Degrees)<br>for: jl80f4b in P c c n                                                                           |
| Table S7 | - Torsion Angles (Degrees)<br>for: jl80f4b in P c c n                                                                        |
| Table S8 | - Contact Distances (Angstrom)<br>for: jl80f4b in P c c n                                                                    |

Table S9 - Hydrogen Bonds (Angstrom, Deg)  
for: j180f4b in P c c n

Table S1 - Crystal Data and Details of the Structure Determination  
for: jl80f4b in P c c n

| Crystal Data                      |                                                                                                                 |
|-----------------------------------|-----------------------------------------------------------------------------------------------------------------|
| Identification code               | jl80f4b                                                                                                         |
| Empirical formula                 | C11 H17 Cl2 N3 O5 Pt                                                                                            |
| Formula weight                    | 537.27                                                                                                          |
| Temperature                       | 150(2) K                                                                                                        |
| Wavelength                        | 0.71069 Å                                                                                                       |
| Crystal system, space group       | Orthorhombic, Pccn                                                                                              |
| Unit cell dimensions              | a = 15.1631(4) Å    alpha = 90 deg.<br>b = 29.3035(7) Å    beta = 90 deg.<br>c = 7.5829(2) Å    gamma = 90 deg. |
| Volume                            | 3369.32(15) Å <sup>3</sup>                                                                                      |
| Z, Calculated density             | 8, 2.118 Mg/m <sup>3</sup>                                                                                      |
| Absorption coefficient            | 8.670 mm <sup>-1</sup>                                                                                          |
| F(000)                            | 2048                                                                                                            |
| Crystal size                      | 0.18 x 0.14 x 0.11 mm                                                                                           |
| Theta range for data collection   | 2.69 to 25.34 deg.                                                                                              |
| Limiting indices                  | -18<=h<=18, -34<=k<=35, -9<=l<=8                                                                                |
| Reflections collected / unique    | 18444 / 3069 [R(int) = 0.0322]                                                                                  |
| Completeness to theta = 25.34     | 99.6 %                                                                                                          |
| Absorption correction             | Semi-empirical from equivalents                                                                                 |
| Max. and min. transmission        | 0.4489 and 0.3044                                                                                               |
| Refinement method                 | Full-matrix least-squares on F <sup>2</sup>                                                                     |
| Data / restraints / parameters    | 3069 / 0 / 213                                                                                                  |
| Goodness-of-fit on F <sup>2</sup> | 1.173                                                                                                           |
| Final R indices [I>2sigma(I)]     | R1 = 0.0283, wR2 = 0.0684                                                                                       |
| R indices (all data)              | R1 = 0.0345, wR2 = 0.0701                                                                                       |
| Largest diff. peak and hole       | 1.449 and -1.452 e.Å <sup>-3</sup>                                                                              |

Table S2 - Final Coordinates and Equivalent Isotropic Displacement Parameters of the non-Hydrogen atoms for: jl80f4b in P c c n

| Atom | x        | y        | z        | U(eq) [Ang <sup>2</sup> ] |
|------|----------|----------|----------|---------------------------|
| ---- | ---      | ---      | ---      | -----                     |
| Pt1  | -0.04678 | 0.08930  | 0.02320  | 0.0192                    |
| Cl1  | -0.01760 | 0.14664  | 0.22056  | 0.0283                    |
| Cl2  | -0.07629 | 0.03350  | -0.18155 | 0.0256                    |
| O1   | 0.22965  | 0.08776  | -0.03998 | 0.0269                    |
| O121 | 0.19489  | 0.18259  | 0.11609  | 0.0360                    |
| O122 | 0.11270  | 0.22085  | -0.08336 | 0.0368                    |
| O221 | -0.26210 | 0.18599  | 0.28454  | 0.0355                    |
| O222 | -0.40389 | 0.19591  | 0.21334  | 0.0354                    |
| N1   | 0.08130  | 0.07464  | 0.01013  | 0.0208                    |
| N2   | -0.17384 | 0.10379  | 0.04455  | 0.0234                    |
| N11  | 0.24220  | 0.04423  | 0.04935  | 0.0256                    |
| C10  | 0.14494  | 0.09942  | -0.04663 | 0.0254                    |
| C11  | 0.13202  | 0.14406  | -0.13529 | 0.0253                    |
| C12  | 0.15124  | 0.18374  | -0.01449 | 0.0282                    |
| C13  | 0.32387  | 0.03450  | 0.05660  | 0.0243                    |
| C20  | -0.24426 | 0.11547  | 0.06053  | 0.0209                    |
| C21  | -0.33256 | 0.13320  | 0.08771  | 0.0286                    |
| C22  | -0.32734 | 0.17501  | 0.20528  | 0.0232                    |
| C122 | 0.12448  | 0.26384  | 0.00581  | 0.0479                    |
| C131 | 0.39926  | 0.06247  | -0.01142 | 0.0284                    |
| C132 | 0.34374  | -0.00968 | 0.14658  | 0.0295                    |
| C222 | -0.40521 | 0.23469  | 0.33443  | 0.0449                    |

U(eq) = 1/3 of the trace of the orthogonalized U Tensor

Table S3 - Hydrogen Atom Positions and Isotropic Displacement Parameters  
for: jl80f4b in P c c n

| Atom | x        | y        | z        | U(iso) [Ang <sup>2</sup> ] |
|------|----------|----------|----------|----------------------------|
| H1   | 0.10154  | 0.04866  | 0.04806  | 0.0103                     |
| H11A | 0.07036  | 0.14626  | -0.17738 | 0.0800                     |
| H11B | 0.17124  | 0.14583  | -0.23943 | 0.0800                     |
| H12A | 0.09294  | 0.28783  | -0.05847 | 0.0800                     |
| H12B | 0.18743  | 0.27132  | 0.01057  | 0.0800                     |
| H12C | 0.10107  | 0.26162  | 0.12597  | 0.0800                     |
| H13A | 0.37640  | 0.09000  | -0.06881 | 0.0800                     |
| H13B | 0.43308  | 0.04451  | -0.09693 | 0.0800                     |
| H13C | 0.43761  | 0.07119  | 0.08699  | 0.0800                     |
| H13D | 0.28852  | -0.02404 | 0.18437  | 0.0800                     |
| H13E | 0.38108  | -0.00398 | 0.24975  | 0.0800                     |
| H13F | 0.37467  | -0.02999 | 0.06464  | 0.0800                     |
| H21A | -0.35668 | 0.13909  | -0.01601 | 0.0384                     |
| H21B | -0.37202 | 0.11053  | 0.14520  | 0.0538                     |
| H22A | -0.46385 | 0.24875  | 0.33321  | 0.0800                     |
| H22B | -0.36113 | 0.25719  | 0.29731  | 0.0800                     |
| H22C | -0.39153 | 0.22415  | 0.45399  | 0.0800                     |

=====

The Temperature Factor has the Form of  $\text{Exp}(-T)$  Where  
 $T = 8 * (\text{Pi}^{**2}) * U * (\text{Sin}(\text{Theta}) / \text{Lambda})^{**2}$  for Isotropic Atoms

Table S4 - (An)isotropic Displacement Parameters  
for: jl80f4b in P c c n

| Atom | U(1,1) or U | U(2,2) | U(3,3) | U(2,3)  | U(1,3)  | U(1,2)  |
|------|-------------|--------|--------|---------|---------|---------|
| Pt1  | 0.0145      | 0.0192 | 0.0241 | 0.0030  | 0.0018  | 0.0013  |
| C11  | 0.0224      | 0.0284 | 0.0340 | -0.0056 | 0.0043  | -0.0005 |
| C12  | 0.0235      | 0.0215 | 0.0317 | -0.0014 | -0.0010 | -0.0010 |
| O1   | 0.0166      | 0.0283 | 0.0357 | 0.0113  | 0.0022  | 0.0022  |
| O121 | 0.0362      | 0.0309 | 0.0410 | 0.0018  | -0.0112 | -0.0054 |
| O122 | 0.0389      | 0.0254 | 0.0460 | 0.0013  | -0.0080 | 0.0062  |
| O221 | 0.0297      | 0.0313 | 0.0456 | -0.0034 | -0.0071 | 0.0004  |
| O222 | 0.0202      | 0.0315 | 0.0545 | -0.0025 | 0.0085  | 0.0042  |
| N1   | 0.0169      | 0.0227 | 0.0229 | 0.0026  | 0.0021  | 0.0049  |
| N2   | 0.0223      | 0.0211 | 0.0269 | 0.0049  | 0.0004  | -0.0022 |
| N11  | 0.0204      | 0.0252 | 0.0312 | 0.0043  | 0.0016  | 0.0010  |
| C10  | 0.0240      | 0.0234 | 0.0288 | -0.0025 | 0.0001  | -0.0005 |
| C11  | 0.0178      | 0.0276 | 0.0303 | 0.0082  | 0.0010  | -0.0016 |
| C12  | 0.0213      | 0.0295 | 0.0337 | 0.0071  | -0.0022 | -0.0019 |
| C13  | 0.0233      | 0.0280 | 0.0215 | -0.0070 | 0.0005  | 0.0024  |
| C20  | 0.0185      | 0.0211 | 0.0232 | 0.0018  | -0.0003 | -0.0019 |
| C21  | 0.0184      | 0.0339 | 0.0335 | 0.0031  | 0       | 0.0026  |
| C22  | 0.0227      | 0.0188 | 0.0282 | 0.0094  | 0.0046  | 0.0005  |
| C122 | 0.0618      | 0.0303 | 0.0516 | -0.0055 | -0.0119 | -0.0050 |
| C131 | 0.0212      | 0.0314 | 0.0326 | -0.0006 | 0       | -0.0011 |
| C132 | 0.0249      | 0.0281 | 0.0354 | 0.0037  | -0.0045 | 0.0027  |
| C222 | 0.0358      | 0.0299 | 0.0690 | -0.0100 | 0.0149  | 0.0042  |

=====

The Temperature Factor has the Form of  $\text{Exp}(-T)$  Where  
 $T = 8 \cdot (\text{Pi}^2) \cdot U \cdot (\text{Sin}(\text{Theta}) / \text{Lambda})^2$  for Isotropic Atoms  
 $T = 2 \cdot (\text{Pi}^2) \cdot \text{Sum}_{ij} (h(i) \cdot h(j) \cdot U(i,j) \cdot \text{Astar}(i) \cdot \text{Astar}(j))$ , for  
Anisotropic Atoms.  $\text{Astar}(i)$  are Reciprocal Axial Lengths and  
 $h(i)$  are the Reflection Indices.

Table S5 - Bond Distances (Angstrom)  
for: jl80f4b in P c c n

|      |       |        |      |       |        |
|------|-------|--------|------|-------|--------|
| Pt1  | -C11  | 2.2932 | C13  | -C132 | 1.4941 |
| Pt1  | -C12  | 2.2988 | C20  | -C21  | 1.4509 |
| Pt1  | -N1   | 1.9915 | C21  | -C22  | 1.5173 |
| Pt1  | -N2   | 1.9795 | C11  | -H11A | 0.9900 |
| O1   | -N11  | 1.4568 | C11  | -H11B | 0.9900 |
| O1   | -C10  | 1.3301 | C21  | -H21A | 0.8800 |
| O121 | -C12  | 1.1915 | C21  | -H21B | 0.9900 |
| O122 | -C12  | 1.3404 | C122 | -H12A | 0.9800 |
| O122 | -C122 | 1.4409 | C122 | -H12B | 0.9800 |
| O221 | -C22  | 1.2014 | C122 | -H12C | 0.9800 |
| O222 | -C22  | 1.3138 | C131 | -H13A | 0.9800 |
| O222 | -C222 | 1.4611 | C131 | -H13B | 0.9800 |
| N1   | -C10  | 1.2821 | C131 | -H13C | 0.9800 |
| N2   | -C20  | 1.1278 | C132 | -H13D | 0.9800 |
| N11  | -C13  | 1.2720 | C132 | -H13E | 0.9800 |
| N1   | -H1   | 0.8700 | C132 | -H13F | 0.9800 |
| C10  | -C11  | 1.4838 | C222 | -H22A | 0.9800 |
| C11  | -C12  | 1.5087 | C222 | -H22B | 0.9800 |
| C13  | -C131 | 1.4982 | C222 | -H22C | 0.9800 |

Table S6 - Bond Angles (Degrees)  
for: jl80f4b in P c c n

|      |       |       |        |      |       |       |        |
|------|-------|-------|--------|------|-------|-------|--------|
| C11  | -Pt1  | -C12  | 178.21 | O221 | -C22  | -C21  | 123.58 |
| C11  | -Pt1  | -N1   | 90.14  | C10  | -C11  | -H11A | 109.00 |
| C11  | -Pt1  | -N2   | 88.70  | C10  | -C11  | -H11B | 109.00 |
| C12  | -Pt1  | -N1   | 90.16  | C12  | -C11  | -H11A | 109.00 |
| C12  | -Pt1  | -N2   | 91.05  | C12  | -C11  | -H11B | 109.00 |
| N1   | -Pt1  | -N2   | 178.16 | H11A | -C11  | -H11B | 108.00 |
| N11  | -O1   | -C10  | 111.64 | C20  | -C21  | -H21A | 109.00 |
| C12  | -O122 | -C122 | 118.19 | C20  | -C21  | -H21B | 112.00 |
| C22  | -O222 | -C222 | 113.82 | C22  | -C21  | -H21A | 113.00 |
| Pt1  | -N1   | -C10  | 128.94 | C22  | -C21  | -H21B | 108.00 |
| Pt1  | -N2   | -C20  | 174.48 | H21A | -C21  | -H21B | 106.00 |
| O1   | -N11  | -C13  | 110.09 | O122 | -C122 | -H12A | 109.00 |
| Pt1  | -N1   | -H1   | 121.00 | O122 | -C122 | -H12B | 109.00 |
| C10  | -N1   | -H1   | 110.00 | O122 | -C122 | -H12C | 109.00 |
| N1   | -C10  | -C11  | 123.51 | H12A | -C122 | -H12B | 109.00 |
| O1   | -C10  | -C11  | 111.79 | H12A | -C122 | -H12C | 109.00 |
| O1   | -C10  | -N1   | 124.65 | H12B | -C122 | -H12C | 109.00 |
| C10  | -C11  | -C12  | 112.26 | C13  | -C131 | -H13A | 109.00 |
| O121 | -C12  | -O122 | 126.08 | C13  | -C131 | -H13B | 109.00 |
| O121 | -C12  | -C11  | 126.16 | C13  | -C131 | -H13C | 109.00 |
| O122 | -C12  | -C11  | 107.73 | H13A | -C131 | -H13B | 109.00 |
| N11  | -C13  | -C131 | 127.25 | H13A | -C131 | -H13C | 109.00 |
| C131 | -C13  | -C132 | 118.51 | H13B | -C131 | -H13C | 109.00 |
| N11  | -C13  | -C132 | 114.22 | C13  | -C132 | -H13D | 109.00 |
| N2   | -C20  | -C21  | 176.05 | C13  | -C132 | -H13E | 109.00 |
| C20  | -C21  | -C22  | 108.93 | C13  | -C132 | -H13F | 109.00 |
| O222 | -C22  | -C21  | 110.96 | H13D | -C132 | -H13E | 109.00 |
| O221 | -C22  | -O222 | 125.40 | H13D | -C132 | -H13F | 109.00 |





Table S6 - Bond Angles (Degrees) (continued)  
for: jl80f4b in P c c n

|      |       |       |        |      |       |       |        |
|------|-------|-------|--------|------|-------|-------|--------|
| H13E | -C132 | -H13F | 109.00 | H22A | -C222 | -H22B | 109.00 |
| O222 | -C222 | -H22A | 109.00 | H22A | -C222 | -H22C | 109.00 |
| O222 | -C222 | -H22B | 109.00 | H22B | -C222 | -H22C | 109.00 |
| O222 | -C222 | -H22C | 109.00 |      |       |       |        |

Table S7 - Torsion Angles (Degrees)  
for: jl80f4b in P c c n

|      |       |      |       |         |
|------|-------|------|-------|---------|
| C11  | -Pt1  | -N1  | -C10  | -63.86  |
| C12  | -Pt1  | -N1  | -C10  | 114.37  |
| C10  | -O1   | -N11 | -C13  | -178.72 |
| N11  | -O1   | -C10 | -N1   | -3.29   |
| N11  | -O1   | -C10 | -C11  | 179.19  |
| C222 | -O222 | -C22 | -C21  | 175.89  |
| C222 | -O222 | -C22 | -O221 | -1.49   |
| Pt1  | -N1   | -C10 | -C11  | -7.22   |
| Pt1  | -N1   | -C10 | -O1   | 175.54  |
| O1   | -N11  | -C13 | -C132 | 179.87  |
| O1   | -N11  | -C13 | -C131 | 0.91    |
| N1   | -C10  | -C11 | -C12  | 102.65  |
| O1   | -C10  | -C11 | -C12  | -79.80  |
| C10  | -C11  | -C12 | -O121 | 20.81   |
| C10  | -C11  | -C12 | -O122 | -161.10 |
| C20  | -C21  | -C22 | -O222 | 171.13  |
| C20  | -C21  | -C22 | -O221 | -11.43  |

Table S8 - Contact Distances (Angstrom)  
for: jl80f4b in P c c n

|     |         |        |      |         |        |
|-----|---------|--------|------|---------|--------|
| Pt1 | .C12    | 4.0934 | O1   | .O121   | 3.0660 |
| Pt1 | .C12_b  | 4.2277 | O1   | .H13A   | 2.2400 |
| Pt1 | .C132_a | 3.8039 | O121 | .O1     | 3.0660 |
| Pt1 | .C21_c  | 3.9884 | O121 | .C122_i | 3.2658 |
| Pt1 | .C22_c  | 3.9703 | O122 | .C122_j | 3.1525 |
| Pt1 | .O222_c | 3.9799 | O122 | .C222_c | 3.2329 |
| Pt1 | .H13E_a | 3.2300 | O121 | .H12C   | 2.7200 |
| Pt1 | .H11A   | 2.8700 | O121 | .H12B_i | 2.3800 |
| Pt1 | .H13B_d | 3.6000 | O121 | .H11B_d | 2.5500 |
| Pt1 | .H21B_c | 3.1800 | O221 | .C20_e  | 2.9427 |
| C11 | .N1     | 3.0408 | O121 | .H12B   | 2.7200 |
| C11 | .N2     | 2.9951 | O221 | .C21_e  | 3.1206 |
| C11 | .C10    | 3.4776 | O221 | .N2_e   | 3.2608 |
| C11 | .C11    | 3.5262 | O122 | .H22A_c | 2.4800 |
| C11 | .C12    | 3.3035 | O122 | .H12C_j | 2.2700 |
| C11 | .C21_e  | 3.6150 | O222 | .Pt1_e  | 3.9799 |
| C12 | .Pt1_b  | 4.2277 | O221 | .H22C   | 2.6000 |
| C12 | .N1_b   | 3.4260 | O221 | .H22B_k | 2.5000 |
| C12 | .N1     | 3.0456 | O221 | .H21A_e | 2.7200 |
| C12 | .N2     | 3.0610 | O221 | .H22B   | 2.5700 |
| C11 | .H12A_f | 3.0500 | N1   | .C11    | 3.0408 |
| C11 | .H21A_e | 2.7700 | N1   | .C12    | 3.0456 |
| C11 | .H13A_d | 3.1400 | N1   | .N11    | 2.6144 |
| C12 | .H13F_g | 3.0000 | N1   | .C12_b  | 3.4260 |
| C12 | .H13B_g | 2.8400 | N2   | .C11    | 2.9951 |
| C12 | .H1_b   | 2.6400 | N2   | .C12    | 3.0610 |
| C12 | .H13C_h | 2.9500 | N2   | .O221_c | 3.2608 |
| C12 | .H21B_c | 2.7300 | N2   | .C22_c  | 3.3128 |



Table S8 - Contact Distances (Angstrom) (continued)  
for: jl80f4b in P c c n

|      |         |        |      |         |        |
|------|---------|--------|------|---------|--------|
| N11  | .N1     | 2.6144 | H12A | .H22A_c | 2.4100 |
| N11  | .H1     | 2.1400 | H12A | .Cl1_j  | 3.0500 |
| C10  | .C13_h  | 3.5909 | H12B | .O121   | 2.7200 |
| C11  | .Cl1    | 3.5262 | H12B | .O121_i | 2.3800 |
| C12  | .Pt1    | 4.0934 | H12B | .C12_i  | 2.7800 |
| C12  | .Cl1    | 3.3035 | H12B | .C122_i | 3.0300 |
| C13  | .C10_d  | 3.5909 | H12B | .H12B_i | 2.2700 |
| C20  | .C22_c  | 3.3881 | H12C | .O121   | 2.7200 |
| C20  | .O221_c | 2.9427 | H12C | .O122_f | 2.2700 |
| C21  | .O221_c | 3.1206 | H12C | .C122_f | 3.0000 |
| C21  | .Pt1_e  | 3.9884 | H13A | .O1     | 2.2400 |
| C21  | .Cl1_c  | 3.6150 | H13A | .Cl1_h  | 3.1400 |
| C22  | .Pt1_e  | 3.9703 | H13B | .Cl2_m  | 2.8400 |
| C22  | .N2_e   | 3.3128 | H13B | .Pt1_h  | 3.6000 |
| C22  | .C20_e  | 3.3881 | H13C | .Cl2_d  | 2.9500 |
| C12  | .H12B_i | 2.7800 | H13E | .Pt1_l  | 3.2300 |
| C122 | .O121_i | 3.2658 | H13F | .Cl2_m  | 3.0000 |
| C122 | .O122_f | 3.1525 | H21A | .Cl1_c  | 2.7700 |
| C132 | .Pt1_l  | 3.8039 | H21A | .O221_c | 2.7200 |
| C122 | .H12B_i | 3.0300 | H21B | .Pt1_e  | 3.1800 |
| C122 | .H12C_j | 3.0000 | H21B | .Cl2_e  | 2.7300 |
| C122 | .H22A_c | 2.8000 | H22A | .O122_e | 2.4800 |
| C222 | .O122_e | 3.2329 | H22A | .C122_e | 2.8000 |
| H1   | .N11    | 2.1400 | H22A | .H12A_e | 2.4100 |
| H1   | .Cl2_b  | 2.6400 | H22B | .O221   | 2.5700 |
| H11A | .Pt1    | 2.8700 | H22B | .O221_k | 2.5000 |
| H11B | .O121_h | 2.5500 | H22C | .O221   | 2.6000 |

Table S9 - Hydrogen Bonds (Angstrom, Deg)  
for: jl80f4b in P c c n

|      |    |      |    |      |        |        |        |        |       |
|------|----|------|----|------|--------|--------|--------|--------|-------|
| N1   | -- | H1   | .. | N11  | 0.8700 | 2.1400 | 2.6144 | 114.00 | .     |
| N1   | -- | H1   | .. | C12  | 0.8700 | 2.6400 | 3.4260 | 151.00 | 5_555 |
| C11  | -- | H11B | .. | O121 | 0.9900 | 2.5500 | 3.4231 | 148.00 | 7_554 |
| C122 | -- | H12B | .. | O121 | 0.9800 | 2.3800 | 3.2658 | 151.00 | 2_555 |
| C122 | -- | H12C | .. | O122 | 0.9800 | 2.2700 | 3.1525 | 149.00 | 8_555 |
| C131 | -- | H13A | .. | O1   | 0.9800 | 2.2400 | 2.6852 | 107.00 | .     |
| C21  | -- | H21A | .. | C11  | 0.8800 | 2.7700 | 3.6150 | 160.00 | 7_454 |
| C21  | -- | H21B | .. | C12  | 0.9900 | 2.7300 | 3.6752 | 160.00 | 7_455 |
| C222 | -- | H22A | .. | O122 | 0.9800 | 2.4800 | 3.2329 | 133.00 | 7_455 |
| C222 | -- | H22B | .. | O221 | 0.9800 | 2.5000 | 3.4615 | 165.00 | 2_455 |

Translation of Symmetry Code to Equiv.Pos

a = [ 3455.00 ] =  $-1/2+x, -y, 1/2-z$   
b = [ 5555.00 ] =  $-x, -y, -z$   
c = [ 7454.00 ] =  $-1/2-x, y, -1/2+z$   
d = [ 7555.00 ] =  $1/2-x, y, 1/2+z$   
e = [ 7455.00 ] =  $-1/2-x, y, 1/2+z$   
f = [ 8555.00 ] =  $x, 1/2-y, 1/2+z$   
g = [ 3454.00 ] =  $-1/2+x, -y, -1/2-z$   
h = [ 7554.00 ] =  $1/2-x, y, -1/2+z$   
i = [ 2555.00 ] =  $1/2-x, 1/2-y, z$   
j = [ 8554.00 ] =  $x, 1/2-y, -1/2+z$   
k = [ 2455.00 ] =  $-1/2-x, 1/2-y, z$   
l = [ 3555.00 ] =  $1/2+x, -y, 1/2-z$   
m = [ 3554.00 ] =  $1/2+x, -y, -1/2-z$
